# Supplementary material for: Formation of Extrachromosomal Circular DNA from Long Terminal Repeats of Retrotransposons in Saccharomyces cerevisiae
Source: PubMed Central journal article supplement (PMC4751563; doi:10.1534/g3.115.025858), 2015-12-17
Supplement: supp_g3.115.025858_FigureS1.pdf [file supp_g3.115.025858_FigureS1.pdf]

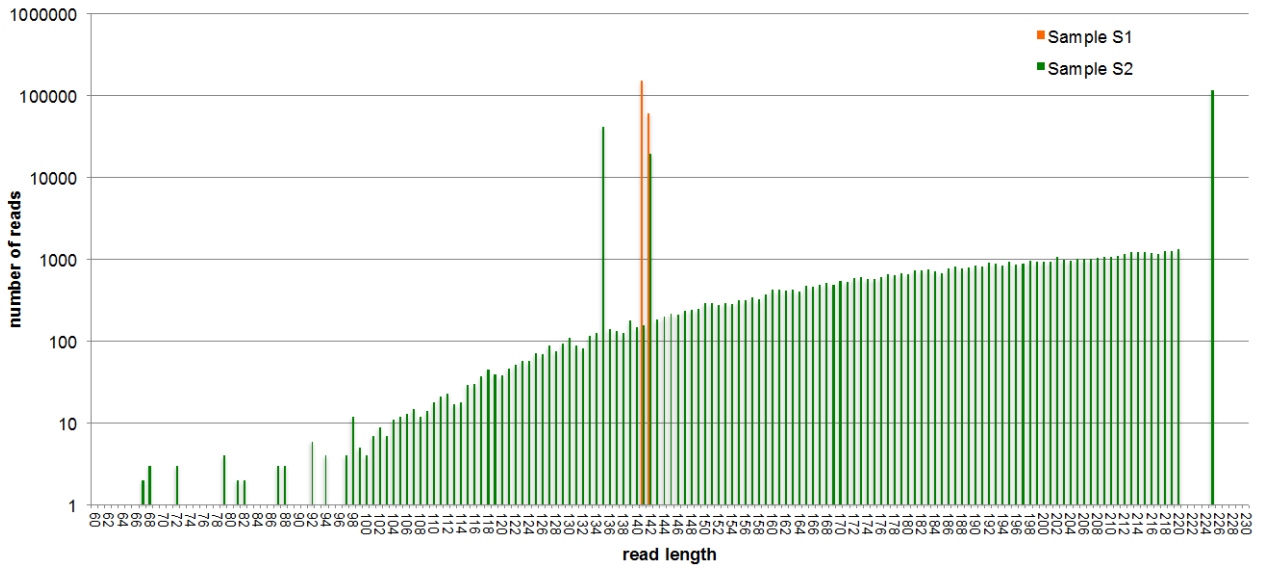

**Figure S1** Sequence read lengths

The distribution of reads length shown for samples S1 and S2. The average reads length is 141.3 nucleotides for sample S1, and 193.0 nucleotides for sample S2.
