# Supplementary material for: Formation of Extrachromosomal Circular DNA from Long Terminal Repeats of Retrotransposons in Saccharomyces cerevisiae
Source: PubMed Central journal article supplement (PMC4751563; doi:10.1534/g3.115.025858), 2015-12-17
Supplement: supp_g3.115.025858_FigureS4.pdf [file supp_g3.115.025858_FigureS4.pdf]

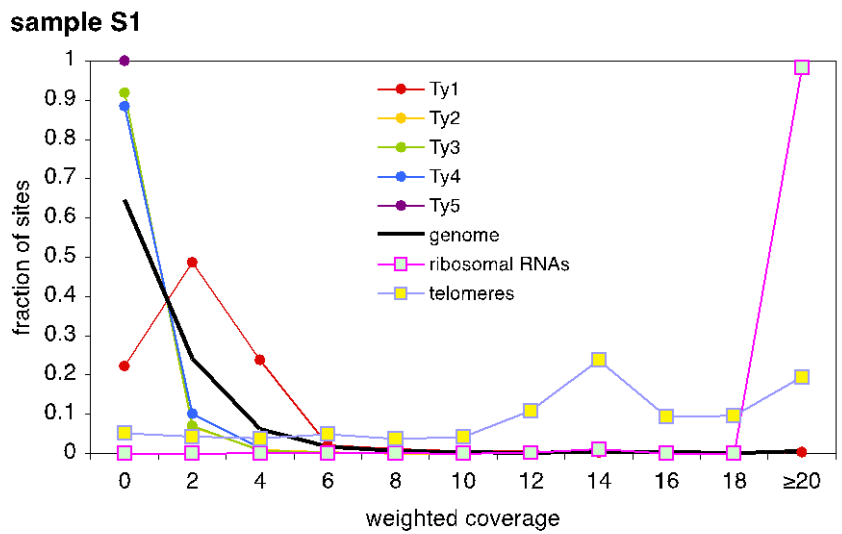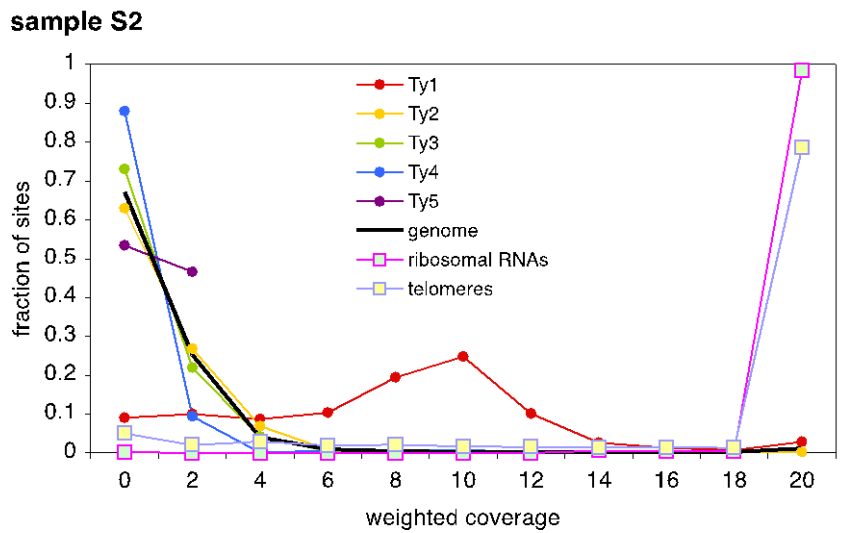

**Figure S4** Distribution of read coverage at Ty elements versus other genomic sites. Similar to figure 4 in main text but including the coverage of telomeric regions and regions harboring ribosomal RNA genes.
