# Supplementary material for: Formation of Extrachromosomal Circular DNA from Long Terminal Repeats of Retrotransposons in Saccharomyces cerevisiae
Source: PubMed Central journal article supplement (PMC4751563; doi:10.1534/g3.115.025858), 2015-12-17
Supplement: supp_g3.115.025858_TableS1.pdf [file supp_g3.115.025858_TableS1.pdf]

**Table S1 Coverage of individual full-length Ty element loci**

| chromosome | start   | stop    | family   | size | number of unique<br>142-mers in element | Sample S1                              |                                                            |                              |                            | Sample S2                              |                                                            |                              |  |
|------------|---------|---------|----------|------|-----------------------------------------|----------------------------------------|------------------------------------------------------------|------------------------------|----------------------------|----------------------------------------|------------------------------------------------------------|------------------------------|--|
|            |         |         |          |      |                                         | percentage of loci<br>covered by reads | percentage of loci<br>covered by uniquely<br>mapping reads | average weighted<br>coverage | average unique<br>coverage | percentage of loci<br>covered by reads | percentage of loci<br>covered by uniquely<br>mapping reads | average weighted<br>coverage |  |
| chrI       | 160239  | 166163  | TY1;Full | 5925 | 404                                     | 99.95                                  | 6.13                                                       | 4.19                         | 0.07                       | 99.98                                  | 14.46                                                      | 10.86                        |  |
| chrII      | 221040  | 226955  | TY1;Full | 5916 | 1391                                    | 95.71                                  | 26.10                                                      | 2.34                         | 0.46                       | 98.80                                  | 43.26                                                      | 6.50                         |  |
| chrII      | 259576  | 265492  | TY1;Full | 5917 | 1002                                    | 95.93                                  | 0.00                                                       | 2.34                         | 0.00                       | 97.89                                  | 11.93                                                      | 7.34                         |  |
| chrIV      | 645508  | 651417  | TY1;Full | 5910 | 199                                     | 99.98                                  | 0.00                                                       | 3.55                         | 0.00                       | 99.98                                  | 13.89                                                      | 10.08                        |  |
| chrIV      | 878301  | 884218  | TY1;Full | 5918 | 693                                     | 98.75                                  | 0.00                                                       | 3.41                         | 0.00                       | 99.97                                  | 18.96                                                      | 10.34                        |  |
| chrIV      | 987155  | 992639  | TY1;Full | 5485 | 197                                     | 99.98                                  | 2.57                                                       | 3.56                         | 0.03                       | 99.98                                  | 15.33                                                      | 10.57                        |  |
| chrIV      | 1095765 | 1101690 | TY1;Full | 5926 | 5                                       | 99.95                                  | 0.00                                                       | 4.21                         | 0.00                       | 99.85                                  | 0.00                                                       | 11.00                        |  |
| chrIV      | 1206697 | 1212614 | TY1;Full | 5918 | 148                                     | 99.71                                  | 3.89                                                       | 3.13                         | 0.10                       | 99.81                                  | 8.01                                                       | 9.59                         |  |
| chrV       | 443393  | 449316  | TY1;Full | 5924 | 4                                       | 99.65                                  | 0.00                                                       | 4.08                         | 0.00                       | 99.90                                  | 0.00                                                       | 11.26                        |  |
| chrV       | 492691  | 498416  | TY1;Full | 5726 | 188                                     | 99.88                                  | 2.46                                                       | 2.68                         | 0.02                       | 99.20                                  | 4.09                                                       | 6.97                         |  |
| chrVII     | 535764  | 541689  | TY1;Full | 5926 | 14                                      | 99.95                                  | 0.00                                                       | 3.66                         | 0.00                       | 99.73                                  | 7.61                                                       | 10.19                        |  |
| chrVII     | 561855  | 567764  | TY1;Full | 5910 | 141                                     | 99.98                                  | 5.74                                                       | 3.84                         | 0.20                       | 99.98                                  | 13.28                                                      | 9.70                         |  |
| chrVII     | 817398  | 823311  | TY1;Full | 5914 | 236                                     | 99.88                                  | 0.00                                                       | 3.03                         | 0.00                       | 99.98                                  | 11.24                                                      | 8.87                         |  |
| chrVIII    | 543610  | 549637  | TY1;Full | 6028 | 521                                     | 99.93                                  | 3.17                                                       | 3.04                         | 0.05                       | 99.05                                  | 10.02                                                      | 7.97                         |  |
| chrX       | 472456  | 478043  | TY1;Full | 5588 | 436                                     | 99.96                                  | 12.99                                                      | 4.39                         | 0.91                       | 99.87                                  | 23.98                                                      | 12.79                        |  |
| chrX       | 478044  | 483965  | TY1;Full | 5922 | 0                                       | 99.98                                  | 2.25                                                       | 3.74                         | 0.02                       | 99.92                                  | 0.00                                                       | 10.53                        |  |
| chrXII     | 215081  | 221006  | TY1;Full | 5926 | 609                                     | 98.95                                  | 0.00                                                       | 2.81                         | 0.00                       | 98.63                                  | 0.00                                                       | 7.48                         |  |
| chrXII     | 475975  | 481898  | TY1;Full | 5924 | 142                                     | 99.98                                  | 0.00                                                       | 4.10                         | 0.00                       | 99.97                                  | 7.21                                                       | 11.25                        |  |
| chrXII     | 593147  | 599054  | TY1;Full | 5908 | 318                                     | 99.54                                  | 0.00                                                       | 2.57                         | 0.00                       | 99.98                                  | 13.44                                                      | 8.08                         |  |
| chrXII     | 650826  | 656744  | TY1;Full | 5919 | 416                                     | 99.85                                  | 0.00                                                       | 3.19                         | 0.00                       | 99.86                                  | 13.68                                                      | 8.80                         |  |
| chrXIII    | 184170  | 190083  | TY1;Full | 5914 | 142                                     | 99.98                                  | 3.38                                                       | 4.08                         | 0.06                       | 99.83                                  | 5.34                                                       | 10.90                        |  |
| chrXIII    | 196332  | 202234  | TY1;Full | 5903 | 155                                     | 99.76                                  | 0.00                                                       | 3.96                         | 0.00                       | 99.70                                  | 2.76                                                       | 10.75                        |  |
| chrXIII    | 357004  | 362917  | TY1;Full | 5914 | 1278                                    | 99.24                                  | 20.71                                                      | 2.32                         | 0.60                       | 97.97                                  | 37.62                                                      | 5.11                         |  |
| chrXIII    | 372696  | 378621  | TY1;Full | 5926 | 75                                      | 99.98                                  | 2.09                                                       | 3.29                         | 0.04                       | 99.88                                  | 6.99                                                       | 8.40                         |  |
| chrXIV     | 96610   | 102523  | TY1;Full | 5914 | 1673                                    | 96.96                                  | 26.36                                                      | 2.44                         | 0.52                       | 92.26                                  | 21.51                                                      | 5.45                         |  |
| chrXIV     | 519164  | 525053  | TY1;Full | 5890 | 1712                                    | 96.86                                  | 16.01                                                      | 3.68                         | 1.44                       | 95.99                                  | 43.06                                                      | 10.16                        |  |
| chrXV      | 117703  | 123628  | TY1;Full | 5926 | 402                                     | 99.98                                  | 3.09                                                       | 4.62                         | 0.69                       | 99.80                                  | 15.79                                                      | 12.55                        |  |
| chrXV      | 594822  | 600735  | TY1;Full | 5914 | 0                                       | 99.95                                  | 0.00                                                       | 3.08                         | 0.00                       | 99.81                                  | 0.00                                                       | 8.77                         |  |
| chrXVI     | 56452   | 62375   | TY1;Full | 5924 | 0                                       | 99.98                                  | 0.00                                                       | 4.10                         | 0.00                       | 99.98                                  | 6.45                                                       | 11.44                        |  |
| chrXVI     | 804651  | 810558  | TY1;Full | 5908 | 0                                       | 99.83                                  | 0.00                                                       | 3.63                         | 0.00                       | 99.98                                  | 0.00                                                       | 10.17                        |  |
| chrXVI     | 844408  | 850336  | TY1;Full | 5929 | 138                                     | 99.92                                  | 0.00                                                       | 4.14                         | 0.00                       | 99.85                                  | 0.00                                                       | 10.68                        |  |
| chrXVI     | 850625  | 856550  | TY1;Full | 5926 | 653                                     | 98.77                                  | 4.74                                                       | 4.93                         | 1.79                       | 99.98                                  | 30.12                                                      | 12.64                        |  |
| chrII      | 29641   | 35599   | TY2;Full | 5959 | 2433                                    | 86.39                                  | 4.03                                                       | 0.52                         | 0.05                       | 83.99                                  | 0.00                                                       | 1.04                         |  |
| chrIII     | 84811   | 90769   | TY2;Full | 5959 | 522                                     | 94.95                                  | 3.52                                                       | 0.73                         | 0.05                       | 96.59                                  | 9.70                                                       | 2.16                         |  |
| chrIV      | 513691  | 519645  | TY2;Full | 5955 | 912                                     | 92.07                                  | 2.38                                                       | 0.68                         | 0.02                       | 95.37                                  | 3.61                                                       | 1.65                         |  |
| chrIV      | 871819  | 877777  | TY2;Full | 5959 | 681                                     | 96.19                                  | 2.37                                                       | 0.67                         | 0.02                       | 95.44                                  | 4.65                                                       | 1.70                         |  |
| chrIV      | 981168  | 987126  | TY2;Full | 5959 | 1344                                    | 99.80                                  | 31.90                                                      | 1.83                         | 1.14                       | 99.95                                  | 57.93                                                      | 6.75                         |  |
| chrVI      | 137908  | 143866  | TY2;Full | 5959 | 1                                       | 93.46                                  | 0.00                                                       | 0.68                         | 0.00                       | 98.61                                  | 0.00                                                       | 1.93                         |  |
| chrVII     | 568745  | 574704  | TY2;Full | 5960 | 698                                     | 96.93                                  | 4.38                                                       | 0.72                         | 0.07                       | 96.17                                  | 5.12                                                       | 1.72                         |  |
| chrVII     | 811452  | 817397  | TY2;Full | 5946 | 12                                      | 93.61                                  | 0.00                                                       | 0.69                         | 0.00                       | 98.65                                  | 0.00                                                       | 1.92                         |  |
| chrXII     | 941190  | 947148  | TY2;Full | 5959 | 689                                     | 93.93                                  | 0.10                                                       | 0.65                         | 0.00                       | 93.07                                  | 3.78                                                       | 1.74                         |  |
| chrXII     | 976255  | 981697  | TY2;Full | 5443 | 690                                     | 90.12                                  | 8.21                                                       | 0.66                         | 0.10                       | 93.96                                  | 7.35                                                       | 1.42                         |  |
| chrXIV     | 562034  | 567993  | TY2;Full | 5960 | 858                                     | 97.38                                  | 16.75                                                      | 0.89                         | 0.28                       | 96.41                                  | 2.99                                                       | 1.56                         |  |
| chrXV      | 704065  | 710025  | TY2;Full | 5961 | 616                                     | 92.62                                  | 2.26                                                       | 0.64                         | 0.04                       | 93.63                                  | 5.99                                                       | 1.46                         |  |
| chrXV      | 970284  | 976238  | TY2;Full | 5955 | 1031                                    | 92.56                                  | 0.00                                                       | 0.62                         | 0.00                       | 91.96                                  | 0.00                                                       | 1.54                         |  |

|         |        |        |          |      |      |       |       |      |      |       |       |      |
|---------|--------|--------|----------|------|------|-------|-------|------|------|-------|-------|------|
| chrIX   | 205217 | 210644 | TY3;Full | 5428 | 3201 | 12.56 | 2.60  | 0.06 | 0.03 | 8.71  | 2.49  | 0.03 |
| chrVII  | 707199 | 712549 | TY3;Full | 5351 | 3122 | 20.48 | 10.54 | 0.14 | 0.11 | 6.04  | 0.00  | 0.01 |
| chrVIII | 85535  | 91757  | TY4;Full | 6223 | 489  | 27.30 | 0.00  | 0.12 | 0.00 | 55.55 | 3.62  | 0.39 |
| chrX    | 197543 | 203768 | TY4;Full | 6226 | 3091 | 38.13 | 18.60 | 0.43 | 0.31 | 42.05 | 7.23  | 0.26 |
| chrXVI  | 436887 | 443109 | TY4;Full | 6223 | 314  | 27.94 | 0.00  | 0.11 | 0.00 | 60.84 | 9.05  | 0.51 |
| chrIII  | 1179   | 4322   | TY5;Full | 3144 | 3003 | 12.53 | 12.53 | 0.13 | 0.13 | 12.72 | 12.72 | 0.17 |

Notes:

Ty elements with at least 99.5% of their entire length covered by sequence reads are highlighted in grey.

Ty elements with no uniquely mapping reads are coloured in blue text if the loci DOES NOT contain any unique 142-mer sequence.

Ty elements with no uniquely mapping reads are coloured in red text if the loci DOES contain unique 142-mer sequence(s).

The full-length Ty1 element at chrX:478044-478043 has no unique 142-mer sequences but nevertheless has uniquely mapping reads. This happens as reads are allowed to map partly to Ty loci and partly to genomic surroundings, whereas unique 142-mers are only considered when residing completely within Ty elements.
