# Supplementary material for: Formation of Extrachromosomal Circular DNA from Long Terminal Repeats of Retrotransposons in Saccharomyces cerevisiae
Source: PubMed Central journal article supplement (PMC4751563; doi:10.1534/g3.115.025858), 2015-12-17
Supplement: supp_g3.115.025858_TableS2.pdf [file supp_g3.115.025858_TableS2.pdf]

**Table S2 Overview of samples**

| Sample | Read length | Number of reads | Strain background | Strain name | Genotype                                                                                                       |
|--------|-------------|-----------------|-------------------|-------------|----------------------------------------------------------------------------------------------------------------|
| S1     | 141.3*      | 73,049,571      | S288c             | M3750       | MATa ura3 gal                                                                                                  |
| S2     | 193*        | 81,221,653      |                   |             |                                                                                                                |
| Z1     | 141         | 72,626,304      | S288c BY          | BY4745      | *MATa his3Δ1 leu2Δ0 met15Δ0 ura3Δ0 KanMX::xxxΔ                                                                 |
| Z3     | 141         | 66,762,805      |                   |             |                                                                                                                |
| R1     | 225         | 23,927,042      | S288c BY          | BY4741      | *MATa his3Δ1 leu2Δ0 met15Δ0 ura3Δ0 KanMX::xxxΔ                                                                 |
| R3     | 141         | 87,929,159      |                   |             |                                                                                                                |
| B02    | 2x141       | 10,714,844      | S288c BY          | UCC5185     | MATa/MATα ade2::hisG/ade2::hisG his3/his3 leu2/leu2 LYS2/lys2 ura3Δ0/ura3Δ0 trp1Δ63/trp1Δ63 MET15/met15Δ::ADE2 |
| B03    | 2x141       | 11,727,134      |                   |             | hoΔ::PSCW11-cre-EBD78-NATMX/hoΔ::PSCW11-creEBD78-NATMX                                                         |
| B04    | 2x141       | 11,973,456      |                   |             | loxP-UBC9-loxP-LEU2/loxP-UBC9-loxP-LEU2 loxP-CDC20-Intron-                                                     |
| B05    | 2x141       | 11,151,228      |                   |             | loxPHPHMX/loxP-CDC20-Intron-loxP-HPHMX                                                                         |
