# Supplementary material for: Formation of Extrachromosomal Circular DNA from Long Terminal Repeats of Retrotransposons in Saccharomyces cerevisiae
Source: PubMed Central journal article supplement (PMC4751563; doi:10.1534/g3.115.025858), 2015-12-17
Supplement: supp_g3.115.025858_TableS3.pdf [file supp_g3.115.025858_TableS3.pdf]

**Table S3 Genomic coordinates of Ty sequences.**

| chromosomes | start  | end    | strand | family | type |
|-------------|--------|--------|--------|--------|------|
| chrI        | 22232  | 22552  | +      | TY1    | S    |
| chrI        | 138754 | 138990 | -      | TY1    | S    |
| chrI        | 160106 | 160237 | -      | TY1    | S    |
| chrI        | 160239 | 166163 | -      | TY1    | F    |
| chrI        | 182614 | 182953 | +      | TY3    | S    |
| chrI        | 183136 | 183468 | +      | TY1    | S    |
| chrI        | 189420 | 189754 | +      | TY2    | S    |
| chrI        | 209460 | 209769 | -      | TY1    | S    |
| chrII       | 8848   | 9092   | +      | TY1    | S    |
| chrII       | 9093   | 9424   | +      | TY2    | S    |
| chrII       | 9425   | 9518   | +      | TY1    | S    |
| chrII       | 29501  | 29640  | +      | TY1    | S    |
| chrII       | 29641  | 35599  | +      | TY2    | F    |
| chrII       | 35600  | 35793  | +      | TY1    | S    |
| chrII       | 35848  | 36218  | -      | TY4    | S    |
| chrII       | 197033 | 197323 | -      | TY1    | S    |
| chrII       | 197717 | 198057 | +      | TY3    | S    |
| chrII       | 198170 | 198252 | -      | TY1    | S    |
| chrII       | 220934 | 221039 | +      | TY1    | S    |
| chrII       | 221040 | 226955 | +      | TY1    | F    |
| chrII       | 258668 | 258974 | -      | TY1    | S    |
| chrII       | 259576 | 265492 | +      | TY1    | F    |
| chrII       | 266178 | 266256 | -      | TY1    | S    |
| chrII       | 327068 | 327393 | +      | TY1    | S    |
| chrII       | 327394 | 327693 | +      | TY1    | S    |
| chrII       | 350457 | 350749 | +      | TY1    | S    |
| chrII       | 460473 | 460762 | +      | TY1    | S    |
| chrII       | 643483 | 643853 | -      | TY4    | S    |
| chrII       | 643854 | 643997 | +      | TY1    | S    |
| chrII       | 644364 | 644596 | -      | TY1    | S    |
| chrIII      | 1179   | 4322   | +      | TY5    | F    |
| chrIII      | 4480   | 4580   | +      | TY5    | S    |
| chrIII      | 82700  | 83036  | +      | TY1    | S    |
| chrIII      | 83055  | 83196  | -      | TY1    | S    |
| chrIII      | 84069  | 84294  | +      | TY1    | S    |
| chrIII      | 84295  | 84626  | +      | TY2    | S    |
| chrIII      | 84627  | 84718  | +      | TY1    | S    |
| chrIII      | 84811  | 90769  | +      | TY2    | F    |
| chrIII      | 124132 | 124463 | -      | TY1    | S    |
| chrIII      | 142790 | 143078 | -      | TY1    | S    |
| chrIII      | 149480 | 149787 | +      | TY1    | S    |
| chrIII      | 150218 | 150540 | +      | TY1    | S    |
| chrIII      | 150693 | 151051 | -      | TY4    | S    |
| chrIII      | 151465 | 151518 | -      | TY1    | S    |
| chrIII      | 151519 | 151849 | +      | TY1    | S    |
| chrIII      | 168387 | 168605 | +      | TY3    | S    |
| chrIII      | 168606 | 168929 | -      | TY1    | S    |
| chrIII      | 168930 | 169064 | +      | TY3    | S    |
| chrIII      | 169203 | 169540 | +      | TY1    | S    |

|        |         |         |   |        |   |
|--------|---------|---------|---|--------|---|
| chrIII | 169569  | 169884  | + | TY1    | S |
| chrIII | 227660  | 227810  | - | TY1    | S |
| chrIII | 291373  | 291709  | + | TY1    | S |
| chrIII | 291919  | 292164  | + | TY5    | S |
| chrIII | 292288  | 292525  | + | TY5    | S |
| chrIII | 295000  | 295317  | + | TY1    | S |
| chrIII | 295856  | 295926  | + | TY1    | S |
| chrIII | 295955  | 296187  | - | TY1    | S |
| chrIV  | 3336    | 3461    | + | TY5    | S |
| chrIV  | 8080    | 8420    | + | TY4    | S |
| chrIV  | 83292   | 83483   | + | TY3_1p | S |
| chrIV  | 359317  | 359480  | - | TY1    | S |
| chrIV  | 434421  | 434737  | - | TY1    | S |
| chrIV  | 434740  | 434944  | - | TY1    | S |
| chrIV  | 434949  | 435096  | + | TY1    | S |
| chrIV  | 437147  | 437516  | + | TY4    | S |
| chrIV  | 437520  | 437697  | - | TY1    | S |
| chrIV  | 512986  | 513256  | - | TY1    | S |
| chrIV  | 513257  | 513588  | - | TY1    | S |
| chrIV  | 513589  | 513641  | - | TY1    | S |
| chrIV  | 513691  | 519645  | - | TY2    | F |
| chrIV  | 519942  | 520157  | + | TY1    | S |
| chrIV  | 520180  | 520474  | - | TY1    | S |
| chrIV  | 520475  | 520794  | + | TY2    | S |
| chrIV  | 620559  | 620662  | - | TY1    | S |
| chrIV  | 645238  | 645507  | - | TY3    | S |
| chrIV  | 645508  | 651417  | - | TY1    | F |
| chrIV  | 651418  | 651501  | - | TY3    | S |
| chrIV  | 651688  | 651956  | - | TY1    | S |
| chrIV  | 668094  | 668434  | + | TY3    | S |
| chrIV  | 668624  | 668782  | + | TY1    | S |
| chrIV  | 802903  | 805652  | + | TY1    | T |
| chrIV  | 805756  | 805972  | - | TY1    | S |
| chrIV  | 871420  | 871742  | + | TY1    | S |
| chrIV  | 871747  | 871818  | - | TY1    | S |
| chrIV  | 871819  | 877777  | + | TY2    | F |
| chrIV  | 877778  | 878042  | - | TY1    | S |
| chrIV  | 878062  | 878300  | + | TY1    | S |
| chrIV  | 878301  | 884218  | - | TY1    | F |
| chrIV  | 945348  | 945670  | + | TY1    | S |
| chrIV  | 945698  | 945757  | - | TY1    | S |
| chrIV  | 945952  | 946292  | - | TY3    | S |
| chrIV  | 981168  | 987126  | + | TY2    | F |
| chrIV  | 987155  | 992639  | - | TY1    | F |
| chrIV  | 992640  | 992739  | + | TY1    | S |
| chrIV  | 992740  | 992812  | - | TY3    | S |
| chrIV  | 1017553 | 1017675 | - | TY1    | S |
| chrIV  | 1017678 | 1018020 | - | TY4    | S |
| chrIV  | 1018212 | 1018366 | + | TY4    | S |
| chrIV  | 1018389 | 1018514 | + | TY1    | S |
| chrIV  | 1023134 | 1023474 | + | TY3    | S |
| chrIV  | 1095639 | 1095764 | - | TY1    | S |
| chrIV  | 1095765 | 1101690 | + | TY1    | F |

|       |         |         |   |        |   |
|-------|---------|---------|---|--------|---|
| chrIV | 1101691 | 1101876 | - | TY1    | S |
| chrIV | 1151034 | 1151363 | + | TY1    | S |
| chrIV | 1151391 | 1151511 | - | TY1    | S |
| chrIV | 1174832 | 1174952 | + | TY1    | S |
| chrIV | 1175129 | 1175310 | - | TY3    | S |
| chrIV | 1175311 | 1175642 | + | TY1    | S |
| chrIV | 1175643 | 1175807 | - | TY3    | S |
| chrIV | 1201081 | 1201275 | + | TY1    | S |
| chrIV | 1201450 | 1201590 | + | TY1    | S |
| chrIV | 1206697 | 1212614 | + | TY1    | F |
| chrIV | 1305352 | 1305442 | - | TY3    | S |
| chrIV | 1352637 | 1352968 | + | TY2    | S |
| chrIV | 1352969 | 1353219 | + | TY1    | S |
| chrIV | 1461957 | 1462025 | + | TY1    | S |
| chrIV | 1516337 | 1516421 | - | TY2    | T |
| chrIV | 1518469 | 1518787 | + | TY1    | S |
| chrIX | 196650  | 197020  | - | TY4    | S |
| chrIX | 197137  | 197485  | - | TY1    | S |
| chrIX | 205217  | 210644  | + | TY3    | F |
| chrIX | 246217  | 246549  | + | TY2    | S |
| chrIX | 300407  | 300725  | - | TY1    | S |
| chrIX | 301656  | 301730  | + | TY1    | S |
| chrIX | 324389  | 324732  | + | TY3    | S |
| chrIX | 324829  | 325162  | + | TY1    | S |
| chrIX | 325163  | 325216  | + | TY1    | S |
| chrIX | 336576  | 336892  | - | TY1    | S |
| chrIX | 426198  | 426422  | - | TY1    | S |
| chrV  | 6986    | 7117    | + | TY5    | S |
| chrV  | 9631    | 9738    | - | TY2    | T |
| chrV  | 62142   | 62474   | + | TY2    | S |
| chrV  | 62475   | 62756   | + | TY1    | S |
| chrV  | 99303   | 99660   | - | TY1    | S |
| chrV  | 118227  | 118556  | - | TY4    | S |
| chrV  | 135608  | 135939  | - | TY2    | S |
| chrV  | 136063  | 136183  | + | TY1    | S |
| chrV  | 137324  | 137612  | + | TY1    | S |
| chrV  | 138221  | 138553  | + | TY1    | S |
| chrV  | 176349  | 176574  | + | TY1    | S |
| chrV  | 176575  | 176714  | - | TY1    | S |
| chrV  | 176715  | 176845  | + | TY1    | S |
| chrV  | 248828  | 249107  | + | TY1    | S |
| chrV  | 249108  | 249406  | - | TY1    | S |
| chrV  | 249444  | 249751  | + | TY1    | S |
| chrV  | 249929  | 250269  | - | TY3    | S |
| chrV  | 287771  | 288056  | - | TY1    | S |
| chrV  | 288643  | 288724  | + | TY1    | S |
| chrV  | 312206  | 312261  | + | TY3_1p | S |
| chrV  | 312272  | 312437  | + | TY1    | S |
| chrV  | 314079  | 314424  | + | TY4    | S |
| chrV  | 354134  | 354355  | + | TY1    | S |
| chrV  | 354356  | 354726  | - | TY4    | S |
| chrV  | 354727  | 354836  | + | TY1    | S |
| chrV  | 354847  | 354913  | - | TY3    | S |

|        |        |        |   |        |   |
|--------|--------|--------|---|--------|---|
| chrV   | 431486 | 431818 | - | TY2    | S |
| chrV   | 434627 | 434967 | - | TY3    | S |
| chrV   | 435066 | 435122 | + | TY1    | S |
| chrV   | 435124 | 435438 | - | TY1    | S |
| chrV   | 435942 | 436273 | - | TY2    | S |
| chrV   | 436275 | 436601 | - | TY4    | S |
| chrV   | 436602 | 436633 | + | TY1    | S |
| chrV   | 438522 | 438584 | - | TY1    | S |
| chrV   | 442730 | 443068 | + | TY1    | S |
| chrV   | 443366 | 443392 | + | TY2    | S |
| chrV   | 443393 | 449316 | - | TY1    | F |
| chrV   | 449317 | 449626 | + | TY2    | S |
| chrV   | 449736 | 450035 | + | TY1    | S |
| chrV   | 469326 | 469388 | - | TY1    | S |
| chrV   | 487829 | 488160 | + | TY2    | S |
| chrV   | 492434 | 492690 | - | TY3    | S |
| chrV   | 492691 | 498416 | - | TY1    | F |
| chrV   | 498417 | 498505 | - | TY3    | S |
| chrV   | 551437 | 551759 | + | TY1    | S |
| chrV   | 552003 | 552216 | - | TY1    | S |
| chrV   | 566695 | 566945 | - | TY5    | S |
| chrV   | 568786 | 569017 | + | TY5    | S |
| chrVI  | 100575 | 100902 | + | TY1    | S |
| chrVI  | 119074 | 119171 | + | TY1    | S |
| chrVI  | 137658 | 137907 | + | TY1    | S |
| chrVI  | 137908 | 143866 | + | TY2    | F |
| chrVI  | 143867 | 143937 | + | TY1    | S |
| chrVI  | 144200 | 144518 | + | TY4    | S |
| chrVI  | 144534 | 144815 | - | TY1    | S |
| chrVI  | 158354 | 158666 | + | TY1    | S |
| chrVI  | 161532 | 161691 | + | TY1    | S |
| chrVI  | 161808 | 162129 | - | TY1    | S |
| chrVI  | 181388 | 181471 | + | TY1    | S |
| chrVI  | 181739 | 181884 | + | TY1    | S |
| chrVI  | 191671 | 191834 | - | TY1    | S |
| chrVI  | 205102 | 205241 | + | TY3_1p | S |
| chrVI  | 205256 | 205503 | - | TY1    | S |
| chrVI  | 206910 | 207126 | + | TY1    | S |
| chrVI  | 261283 | 261475 | + | TY1    | S |
| chrVII | 863    | 1079   | + | TY5    | S |
| chrVII | 1080   | 1239   | + | TY5    | S |
| chrVII | 110811 | 110858 | - | TY2    | S |
| chrVII | 110859 | 111229 | + | TY4    | S |
| chrVII | 111230 | 111509 | - | TY2    | S |
| chrVII | 111510 | 111702 | + | TY1    | S |
| chrVII | 114943 | 115273 | + | TY1    | S |
| chrVII | 121168 | 121340 | + | TY1    | S |
| chrVII | 122093 | 122145 | - | TY1    | S |
| chrVII | 204990 | 205343 | + | TY4    | S |
| chrVII | 287945 | 288115 | + | TY1    | S |
| chrVII | 318686 | 318826 | + | TY1    | S |
| chrVII | 318827 | 318984 | - | TY4    | S |
| chrVII | 319033 | 319344 | - | TY1    | S |

|         |        |        |   |        |   |
|---------|--------|--------|---|--------|---|
| chrVII  | 319426 | 319765 | - | TY3    | S |
| chrVII  | 320358 | 320710 | - | TY4    | S |
| chrVII  | 327132 | 327346 | - | TY1    | S |
| chrVII  | 327907 | 328220 | + | TY1    | S |
| chrVII  | 328230 | 328503 | + | TY1    | S |
| chrVII  | 401619 | 401897 | + | TY3    | S |
| chrVII  | 401962 | 402293 | + | TY1    | S |
| chrVII  | 405007 | 405148 | + | TY2    | S |
| chrVII  | 405149 | 405210 | + | TY2    | S |
| chrVII  | 405231 | 405456 | - | TY3    | S |
| chrVII  | 412458 | 412727 | + | TY1    | S |
| chrVII  | 412819 | 412887 | + | TY3_1p | S |
| chrVII  | 535215 | 535546 | + | TY1    | S |
| chrVII  | 535548 | 535763 | - | TY1    | S |
| chrVII  | 535764 | 541689 | + | TY1    | F |
| chrVII  | 541690 | 541786 | - | TY1    | S |
| chrVII  | 561855 | 567764 | - | TY1    | F |
| chrVII  | 568168 | 568287 | + | TY3_1p | S |
| chrVII  | 568745 | 574704 | - | TY2    | F |
| chrVII  | 660647 | 660936 | - | TY1    | S |
| chrVII  | 701114 | 701354 | + | TY1    | S |
| chrVII  | 701356 | 701546 | + | TY1    | S |
| chrVII  | 707199 | 712549 | + | TY3    | F |
| chrVII  | 712900 | 713081 | + | TY4    | S |
| chrVII  | 713088 | 713388 | - | TY1    | S |
| chrVII  | 735492 | 735546 | - | TY1    | S |
| chrVII  | 735549 | 735877 | + | TY1    | S |
| chrVII  | 735987 | 736327 | + | TY3    | S |
| chrVII  | 738565 | 738604 | + | TY1    | S |
| chrVII  | 738741 | 739040 | + | TY1    | S |
| chrVII  | 774041 | 774167 | + | TY1    | S |
| chrVII  | 778789 | 779117 | + | TY2    | S |
| chrVII  | 779118 | 779236 | + | TY1    | S |
| chrVII  | 779237 | 779520 | - | TY1    | S |
| chrVII  | 793244 | 793564 | + | TY1    | S |
| chrVII  | 811101 | 811238 | - | TY4    | S |
| chrVII  | 811452 | 817397 | + | TY2    | F |
| chrVII  | 817398 | 823311 | - | TY1    | F |
| chrVII  | 845286 | 845635 | + | TY3    | S |
| chrVII  | 875350 | 875666 | + | TY1    | S |
| chrVII  | 875956 | 876284 | + | TY1    | S |
| chrVII  | 879030 | 879240 | + | TY4    | S |
| chrVII  | 879273 | 879464 | + | TY1    | S |
| chrVII  | 931174 | 931543 | - | TY4    | S |
| chrVII  | 931691 | 932022 | + | TY1    | S |
| chrVIII | 7993   | 8224   | - | TY5    | S |
| chrVIII | 13261  | 13324  | - | TY5    | S |
| chrVIII | 85384  | 85534  | - | TY3    | S |
| chrVIII | 85535  | 91757  | + | TY4    | F |
| chrVIII | 91773  | 92095  | - | TY2    | S |
| chrVIII | 92272  | 92386  | + | TY1    | S |
| chrVIII | 116416 | 116747 | - | TY1    | S |
| chrVIII | 116767 | 117054 | - | TY1    | S |

|         |        |        |   |        |   |
|---------|--------|--------|---|--------|---|
| chrVIII | 133198 | 133395 | - | TY1    | S |
| chrVIII | 133568 | 133679 | - | TY1    | S |
| chrVIII | 133680 | 134002 | + | TY1    | S |
| chrVIII | 134003 | 134217 | - | TY1    | S |
| chrVIII | 146324 | 146664 | - | TY3    | S |
| chrVIII | 146837 | 147705 | + | TY4    | T |
| chrVIII | 238007 | 238205 | + | TY1    | S |
| chrVIII | 238305 | 238394 | + | TY4    | S |
| chrVIII | 358685 | 358852 | - | TY1    | S |
| chrVIII | 358853 | 359070 | - | TY4    | S |
| chrVIII | 359071 | 359477 | - | TY1    | S |
| chrVIII | 359082 | 359346 | + | TY1    | S |
| chrVIII | 389180 | 389512 | - | TY2    | S |
| chrVIII | 389513 | 389584 | + | TY1    | S |
| chrVIII | 389630 | 389847 | - | TY1    | S |
| chrVIII | 463920 | 464147 | - | TY1    | S |
| chrVIII | 466423 | 466474 | + | TY3_1p | S |
| chrVIII | 466556 | 466863 | + | TY1    | S |
| chrVIII | 466881 | 466975 | - | TY3    | S |
| chrVIII | 530070 | 530379 | - | TY1    | S |
| chrVIII | 543610 | 549637 | - | TY1    | F |
| chrX    | 29187  | 29409  | + | TY1    | S |
| chrX    | 59504  | 59783  | + | TY1    | S |
| chrX    | 197399 | 197492 | + | TY3    | S |
| chrX    | 197493 | 197542 | + | TY1    | S |
| chrX    | 197543 | 203768 | + | TY4    | F |
| chrX    | 203769 | 204392 | + | TY1    | S |
| chrX    | 203793 | 204114 | - | TY2    | S |
| chrX    | 354539 | 354838 | - | TY1    | S |
| chrX    | 354839 | 355170 | - | TY2    | S |
| chrX    | 374768 | 374835 | - | TY4    | S |
| chrX    | 374849 | 374902 | - | TY1    | S |
| chrX    | 377539 | 377590 | + | TY1    | S |
| chrX    | 377600 | 377854 | - | TY1    | S |
| chrX    | 378009 | 378279 | - | TY3_1p | S |
| chrX    | 416260 | 416425 | + | TY4    | S |
| chrX    | 416504 | 417018 | + | TY1    | S |
| chrX    | 421918 | 422290 | + | TY4    | S |
| chrX    | 422588 | 422881 | + | TY1    | S |
| chrX    | 472456 | 478043 | + | TY1    | F |
| chrX    | 478044 | 483965 | + | TY1    | F |
| chrX    | 517951 | 518091 | + | TY1    | S |
| chrX    | 531508 | 531757 | - | TY1    | S |
| chrX    | 537733 | 538027 | - | TY1    | S |
| chrX    | 538096 | 538427 | + | TY2    | S |
| chrX    | 540759 | 541079 | + | TY1    | S |
| chrX    | 541088 | 541420 | - | TY2    | S |
| chrX    | 543441 | 543762 | + | TY1    | S |
| chrX    | 737371 | 737678 | - | TY4    | S |
| chrX    | 742331 | 742456 | - | TY5    | S |
| chrXI   | 74241  | 74523  | + | TY1    | S |
| chrXI   | 83813  | 84120  | - | TY1    | S |
| chrXI   | 141176 | 141294 | - | TY1    | S |

|        |        |        |   |        |   |
|--------|--------|--------|---|--------|---|
| chrXI  | 162836 | 163174 | + | TY1    | S |
| chrXI  | 163175 | 163394 | - | TY4    | S |
| chrXI  | 202288 | 202627 | - | TY3    | S |
| chrXI  | 219058 | 219367 | - | TY1    | S |
| chrXI  | 301950 | 301983 | + | TY1    | S |
| chrXI  | 301984 | 302269 | - | TY1    | S |
| chrXI  | 313247 | 313562 | - | TY1    | S |
| chrXI  | 313837 | 314158 | + | TY2    | S |
| chrXI  | 378914 | 378980 | - | TY3    | S |
| chrXI  | 378991 | 379112 | + | TY1    | S |
| chrXI  | 379113 | 379265 | - | TY3_1p | S |
| chrXI  | 457783 | 458114 | - | TY1    | S |
| chrXI  | 489929 | 490057 | - | TY1    | S |
| chrXI  | 490107 | 490430 | + | TY1    | S |
| chrXI  | 490431 | 490489 | + | TY1    | S |
| chrXI  | 513174 | 513483 | - | TY1    | S |
| chrXI  | 517095 | 517426 | - | TY1    | S |
| chrXI  | 664814 | 664914 | - | TY5    | S |
| chrXI  | 665068 | 665306 | + | TY5    | S |
| chrXII | 91573  | 91822  | - | TY4    | S |
| chrXII | 91959  | 92048  | - | TY1    | S |
| chrXII | 92049  | 92380  | - | TY1    | S |
| chrXII | 92381  | 92480  | - | TY1    | S |
| chrXII | 168042 | 168379 | - | TY3    | S |
| chrXII | 168542 | 168649 | + | TY1    | S |
| chrXII | 168650 | 168732 | - | TY1    | S |
| chrXII | 215081 | 221006 | - | TY1    | F |
| chrXII | 221008 | 221307 | + | TY1    | S |
| chrXII | 365832 | 366145 | - | TY1    | S |
| chrXII | 373480 | 373534 | - | TY1    | S |
| chrXII | 373770 | 373969 | - | TY1    | S |
| chrXII | 374000 | 374339 | + | TY3    | S |
| chrXII | 426829 | 427002 | - | TY3_1p | S |
| chrXII | 448843 | 449114 | + | TY1    | S |
| chrXII | 475975 | 481898 | - | TY1    | F |
| chrXII | 592708 | 593037 | - | TY1    | S |
| chrXII | 593147 | 599054 | + | TY1    | F |
| chrXII | 599171 | 599269 | - | TY4    | S |
| chrXII | 599270 | 599518 | + | TY1    | S |
| chrXII | 599519 | 599831 | - | TY4    | S |
| chrXII | 599843 | 599913 | + | TY1    | S |
| chrXII | 650826 | 656744 | + | TY1    | F |
| chrXII | 657024 | 657366 | + | TY3    | S |
| chrXII | 657451 | 657769 | + | TY1    | S |
| chrXII | 688131 | 688363 | - | TY2    | S |
| chrXII | 688371 | 688666 | + | TY1    | S |
| chrXII | 731680 | 732002 | - | TY2    | S |
| chrXII | 734384 | 734673 | - | TY1    | S |
| chrXII | 784208 | 784288 | - | TY1    | S |
| chrXII | 793552 | 793870 | + | TY3    | S |
| chrXII | 796764 | 797088 | + | TY1    | S |
| chrXII | 817840 | 818072 | + | TY4    | S |
| chrXII | 818073 | 818403 | - | TY1    | S |

|         |         |         |   |        |   |
|---------|---------|---------|---|--------|---|
| chrXII  | 941190  | 947148  | + | TY2    | F |
| chrXII  | 963217  | 963535  | + | TY1    | S |
| chrXII  | 976255  | 981697  | - | TY2    | F |
| chrXII  | 1052301 | 1052630 | - | TY1    | S |
| chrXII  | 1052660 | 1052754 | - | TY1    | S |
| chrXIII | 131989  | 132317  | - | TY1    | S |
| chrXIII | 167945  | 168262  | - | TY1    | S |
| chrXIII | 168349  | 168681  | - | TY2    | S |
| chrXIII | 184170  | 190083  | + | TY1    | F |
| chrXIII | 196332  | 202234  | + | TY1    | F |
| chrXIII | 259596  | 259901  | - | TY1    | S |
| chrXIII | 289947  | 290015  | - | TY1    | S |
| chrXIII | 290048  | 290223  | - | TY4    | S |
| chrXIII | 290441  | 290521  | + | TY1    | S |
| chrXIII | 290583  | 290660  | - | TY1    | S |
| chrXIII | 321342  | 321527  | - | TY4    | S |
| chrXIII | 357004  | 362917  | - | TY1    | F |
| chrXIII | 372626  | 372695  | + | TY1    | S |
| chrXIII | 372696  | 378621  | - | TY1    | F |
| chrXIII | 378622  | 379197  | + | TY1    | S |
| chrXIII | 378731  | 379060  | - | TY1    | S |
| chrXIII | 420973  | 421316  | - | TY1    | S |
| chrXIII | 462885  | 463103  | - | TY1    | S |
| chrXIII | 463140  | 463460  | - | TY1    | S |
| chrXIII | 481213  | 481544  | - | TY1    | S |
| chrXIII | 481570  | 481807  | + | TY1    | S |
| chrXIII | 503191  | 503381  | + | TY1    | S |
| chrXIII | 503664  | 503766  | + | TY1    | S |
| chrXIII | 503770  | 504140  | + | TY4    | S |
| chrXIII | 504242  | 504344  | + | TY4    | S |
| chrXIII | 504345  | 504676  | + | TY1    | S |
| chrXIII | 504677  | 504781  | + | TY4    | S |
| chrXIII | 573111  | 573337  | - | TY1    | S |
| chrXIII | 573356  | 573445  | - | TY1    | S |
| chrXIII | 748025  | 748124  | + | TY1    | S |
| chrXIII | 768547  | 768878  | + | TY2    | S |
| chrXIII | 768879  | 769211  | + | TY1    | S |
| chrXIII | 808536  | 808905  | - | TY4    | S |
| chrXIII | 808999  | 809232  | + | TY1    | S |
| chrXIII | 837476  | 837753  | + | TY1    | S |
| chrXIII | 837754  | 837904  | + | TY3    | S |
| chrXIV  | 96451   | 96609   | + | TY4    | S |
| chrXIV  | 96610   | 102523  | - | TY1    | F |
| chrXIV  | 102549  | 102631  | + | TY1    | S |
| chrXIV  | 102632  | 102700  | - | TY3    | S |
| chrXIV  | 102701  | 104702  | + | TY1    | S |
| chrXIV  | 519164  | 525053  | + | TY1    | F |
| chrXIV  | 546424  | 546685  | + | TY3_1p | S |
| chrXIV  | 546739  | 547078  | + | TY3    | S |
| chrXIV  | 552282  | 552482  | - | TY1    | S |
| chrXIV  | 552800  | 553128  | + | TY1    | S |
| chrXIV  | 561378  | 561486  | + | TY1    | S |
| chrXIV  | 561500  | 561606  | - | TY1    | S |



|        |        |        |   |        |   |
|--------|--------|--------|---|--------|---|
| chrXIV | 561608 | 561978 | + | TY4    | S |
| chrXIV | 562034 | 567993 | - | TY2    | F |
| chrXIV | 631937 | 631999 | + | TY3_1p | S |
| chrXIV | 632007 | 632112 | - | TY1    | S |
| chrXIV | 632121 | 632491 | - | TY4    | S |
| chrXIV | 726235 | 726575 | + | TY3    | S |
| chrXIV | 726615 | 726946 | - | TY2    | S |
| chrXIV | 726952 | 727214 | + | TY3_1p | S |
| chrXIV | 727364 | 727667 | - | TY1    | S |
| chrXV  | 2894   | 3223   | - | TY1    | S |
| chrXV  | 3809   | 3986   | + | TY4    | S |
| chrXV  | 16739  | 16933  | + | TY1    | S |
| chrXV  | 18163  | 18259  | - | TY1    | S |
| chrXV  | 18301  | 18554  | - | TY1    | S |
| chrXV  | 33629  | 33930  | + | TY1    | S |
| chrXV  | 113294 | 113626 | - | TY1    | S |
| chrXV  | 113685 | 113752 | - | TY1    | S |
| chrXV  | 117703 | 123628 | + | TY1    | F |
| chrXV  | 226696 | 227037 | + | TY3    | S |
| chrXV  | 227096 | 227234 | + | TY1    | S |
| chrXV  | 227693 | 227860 | + | TY1    | S |
| chrXV  | 227861 | 228178 | - | TY1    | S |
| chrXV  | 228179 | 228263 | + | TY1    | S |
| chrXV  | 300235 | 300441 | - | TY1    | S |
| chrXV  | 300686 | 301023 | - | TY1    | S |
| chrXV  | 340600 | 340900 | - | TY1    | S |
| chrXV  | 354129 | 354467 | + | TY3    | S |
| chrXV  | 354682 | 354959 | + | TY1    | S |
| chrXV  | 355118 | 355188 | + | TY1    | S |
| chrXV  | 436924 | 437008 | + | TY1    | S |
| chrXV  | 437304 | 438486 | - | TY1    | T |
| chrXV  | 463542 | 463647 | + | TY1    | S |
| chrXV  | 571361 | 571462 | - | TY4    | S |
| chrXV  | 571491 | 571808 | + | TY1    | S |
| chrXV  | 594514 | 594813 | + | TY1    | S |
| chrXV  | 594822 | 600735 | + | TY1    | F |
| chrXV  | 664004 | 664326 | - | TY1    | S |
| chrXV  | 664330 | 664465 | + | TY1    | S |
| chrXV  | 664815 | 665147 | + | TY2    | S |
| chrXV  | 697504 | 697770 | - | TY1    | S |
| chrXV  | 697810 | 697906 | - | TY4    | S |
| chrXV  | 703158 | 703382 | - | TY3    | S |
| chrXV  | 703431 | 703662 | - | TY1    | S |
| chrXV  | 703671 | 703754 | + | TY1    | S |
| chrXV  | 703774 | 704064 | + | TY4    | S |
| chrXV  | 704065 | 710025 | - | TY2    | F |
| chrXV  | 710026 | 710109 | + | TY4    | S |
| chrXV  | 854275 | 854614 | + | TY3    | S |
| chrXV  | 968989 | 969299 | + | TY3    | S |
| chrXV  | 969300 | 969429 | + | TY1    | S |
| chrXV  | 969430 | 976400 | + | TY3    | S |
| chrXV  | 970284 | 976238 | + | TY2    | F |
| chrXV  | 976257 | 976336 | - | TY1    | S |

|        |        |        |   |        |   |
|--------|--------|--------|---|--------|---|
| chrXV  | 979867 | 980140 | + | TY1    | S |
| chrXV  | 980257 | 980588 | - | TY1    | S |
| chrXVI | 55663  | 55858  | - | TY1    | S |
| chrXVI | 56290  | 56356  | + | TY3    | S |
| chrXVI | 56357  | 56451  | + | TY1    | S |
| chrXVI | 56452  | 62375  | + | TY1    | F |
| chrXVI | 62376  | 63006  | + | TY1    | S |
| chrXVI | 62389  | 62720  | + | TY2    | S |
| chrXVI | 210450 | 210770 | + | TY1    | S |
| chrXVI | 211576 | 211907 | + | TY2    | S |
| chrXVI | 436058 | 436246 | + | TY1    | S |
| chrXVI | 436247 | 436584 | - | TY1    | S |
| chrXVI | 436585 | 436728 | + | TY1    | S |
| chrXVI | 436887 | 443109 | - | TY4    | F |
| chrXVI | 560478 | 560809 | + | TY1    | S |
| chrXVI | 560810 | 561081 | + | TY1    | S |
| chrXVI | 561165 | 561320 | - | TY3_1p | S |
| chrXVI | 571693 | 571834 | + | TY1    | S |
| chrXVI | 571842 | 572170 | - | TY1    | S |
| chrXVI | 689059 | 689439 | - | TY1    | S |
| chrXVI | 769317 | 769657 | + | TY3    | S |
| chrXVI | 769801 | 769897 | + | TY1    | S |
| chrXVI | 775858 | 776090 | + | TY3_1p | S |
| chrXVI | 776091 | 776401 | + | TY1    | S |
| chrXVI | 776402 | 776502 | + | TY3_1p | S |
| chrXVI | 776665 | 776854 | - | TY1    | S |
| chrXVI | 777842 | 778152 | + | TY1    | S |
| chrXVI | 780918 | 781217 | - | TY1    | S |
| chrXVI | 804495 | 804634 | + | TY1    | S |
| chrXVI | 804651 | 810558 | - | TY1    | F |
| chrXVI | 844355 | 844407 | - | TY1    | S |
| chrXVI | 844408 | 850336 | + | TY1    | F |
| chrXVI | 850337 | 850508 | - | TY1    | S |
| chrXVI | 850625 | 856550 | - | TY1    | F |
| chrXVI | 856551 | 856881 | + | TY3    | S |
| chrXVI | 880382 | 880722 | + | TY3    | S |
| chrXVI | 880770 | 880965 | - | TY3_1p | S |
| chrXVI | 881483 | 881826 | - | TY4    | S |
| chrXVI | 933067 | 933400 | + | TY4    | S |
| chrXVI | 933539 | 933675 | + | TY1    | S |
| chrXVI | 937876 | 937992 | - | TY1    | S |

Taken from Carr et al. with few adjustments.

Types denotes full-length (F), solo LTR (S), or truncated element (T)
